# Supplementary material
Source: PubMed Central journal article supplement (PMC7611106)

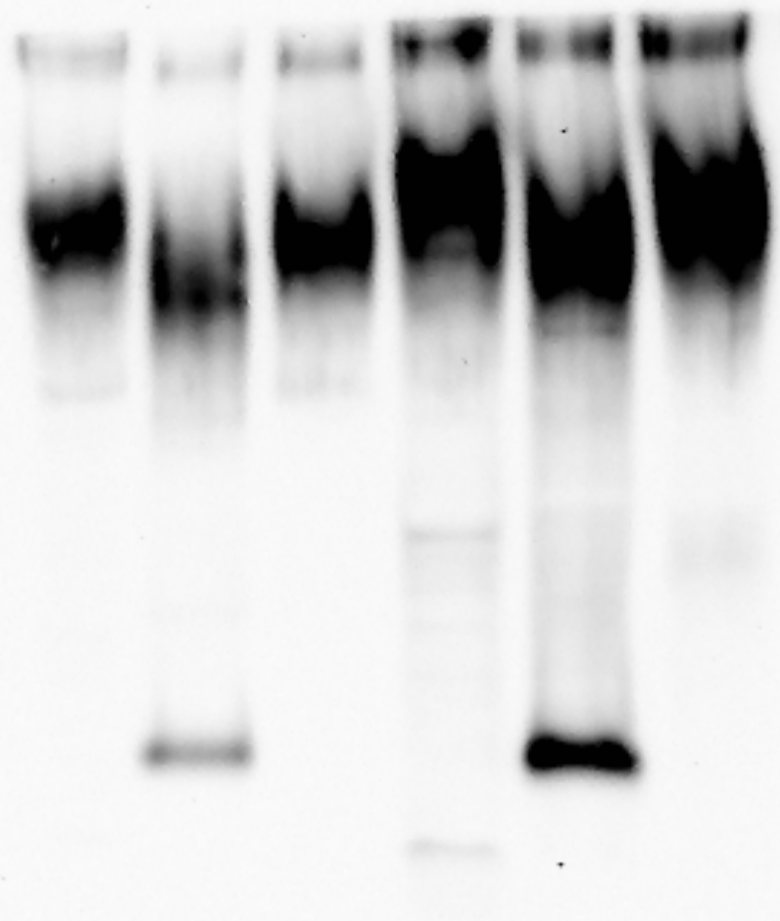

1

Supplement: EMS120874-supplement-Unmodified_Gel_ED_Fig_6.pdf [file EMS120874-supplement-Unmodified_Gel_ED_Fig_6.pdf]
